# Supplementary material
Source: PubMed Central journal article supplement (PMC5935136)

## **Inventory of Supplemental Information**

**Table S1, related to Figure 1.** Signaling lipids in humans pre- vs. post-exercise.

**Table S2, related to Figure 1.** Spearman and Pearson correlation coefficient with % Fat Mass as a covariate.

**Table S3, related to Figure 2.** Signaling lipids in mouse BAT, Sedentary vs. Trained.

**Table S4, related to Figures 2, S2.** Primer sets used in this study.

**Video S1, related to Figure 3.** Representative imaging of FFA-SS-Luc uptake in Acta1cre+/-Rosa(stop)Luc+/- injected intravenously with luciferin-conjugated fatty acid and 12,13-diHOME or vehicle. Data from individual images using sequential, thirty second exposures over approximately 15 minutes was stacked into a movie. The animal on the right is the vehicle treated and the mouse on the left is treated with 12,13-diHOME.

**Figure S1, related to Figure 1.** Lipidomics in human subjects after acute exercise.

**Figure S2, related to Figures 2 and 4.** Body mass after exercise; gene expression after acute injection of 12,13-diHOME.

**Figure S3, related to Figure 4.** 12,13-diHOME does not affect glucose uptake into skeletal muscle.

**Supplemental Table 1. Related to Figure 1.**

| <b>Signaling Lipids in Humans Pre- vs. Post-Exercise</b> |                         |            |                          |            |                |
|----------------------------------------------------------|-------------------------|------------|--------------------------|------------|----------------|
| <b>Lipid</b>                                             | <b>Avg Pre-Exercise</b> | <b>SEM</b> | <b>Avg Post-Exercise</b> | <b>SEM</b> | <b>p-value</b> |
| IS-d4-9,10-diHOME                                        | 0.0000                  | 0.0000     | 0.0000                   | 0.0000     | 0.0000         |
| Tetranor-12-HETE                                         | 0.0473                  | 0.0071     | 0.0323                   | 0.0035     | 0.0646         |
| 9-oxoODE                                                 | 0.1293                  | 0.0166     | 0.0790                   | 0.0094     | 0.0117         |
| 13-oxoODE                                                | 0.4271                  | 0.0442     | 0.2706                   | 0.0411     | 0.0122         |
| 9-HOTrE                                                  | 0.1101                  | 0.0158     | 0.0691                   | 0.0110     | 0.0379         |
| 13-HOTrE/13-HOTrE(r)                                     | 0.0531                  | 0.0053     | 0.0357                   | 0.0042     | 0.0131         |
| 9-HODE                                                   | 1.4517                  | 0.2541     | 1.3389                   | 0.1472     | 0.7026         |
| 13-HODE                                                  | 2.0219                  | 0.2422     | 1.2251                   | 0.1141     | 0.0049         |
| 9(10)-EpOME                                              | 3.8920                  | 0.5678     | 2.1015                   | 0.2415     | 0.0062         |
| 12(13)-EpOME                                             | 1.4799                  | 0.2207     | 1.8134                   | 0.1773     | 0.2442         |
| 9,10-diHOME                                              | 1.3140                  | 0.2840     | 1.9588                   | 0.4610     | 0.2397         |
| <b>12,13-diHOME*</b>                                     | 1.2308                  | 0.1774     | 2.5021                   | 0.3343     | 0.0017         |
| 15-deoxy-delta12,14-PGJ2                                 | 0.0148                  | 0.0033     | 0.0126                   | 0.0016     | 0.6048         |
| 15-oxoETE                                                | 0.0941                  | 0.0146     | 0.0652                   | 0.0134     | 0.1494         |
| 18-HEPE                                                  | 0.0132                  | 0.0021     | 0.0114                   | 0.0016     | 0.5482         |
| 15-HEPE                                                  | 0.0121                  | 0.0023     | 0.0108                   | 0.0015     | 0.6982         |
| 12-HEPE                                                  | 0.0190                  | 0.0030     | 0.0229                   | 0.0037     | 0.4653         |
| 5-HEPE                                                   | 0.0215                  | 0.0036     | 0.0147                   | 0.0022     | 0.1483         |
| 11-HEPE                                                  | 0.0110                  | 0.0019     | 0.0087                   | 0.0010     | 0.3565         |
| 8-HEPE                                                   | 0.0142                  | 0.0036     | 0.0093                   | 0.0016     | 0.4145         |
| 9-HEPE                                                   | 0.0108                  | 0.0008     | 0.0069                   | 0.0007     | 0.0030         |
| 12-oxoETE                                                | 0.0132                  | 0.0015     | 0.0077                   | 0.0013     | 0.0302         |
| 14(15)-EpETE                                             | 0.0089                  | 0.0010     | 0.0072                   | 0.0008     | 0.3102         |
| 17(18)-EpETE                                             | 0.0078                  | 0.0009     | 0.0075                   | 0.0012     | 0.9092         |
| 5-oxoETE                                                 | 0.0125                  | 0.0016     | 0.0113                   | 0.0015     | 0.6210         |
| 14(15)-EET                                               | 0.0413                  | 0.0050     | 0.0260                   | 0.0033     | 0.0140         |
| 11(12)-EET                                               | 0.0061                  | 0.0010     | 0.0048                   | 0.0005     | 0.3917         |
| 8(9)-EET                                                 | 0.0065                  | 0.0006     | 0.0053                   | 0.0005     | 0.5482         |
| 5(6)-EET                                                 | 0.0000                  | 0.0000     | 0.0027                   | 0.0003     | 0.0000         |
| 15-HETE                                                  | 0.0360                  | 0.0037     | 0.0310                   | 0.0040     | 0.3591         |
| 12-HETE                                                  | 0.7583                  | 0.2222     | 1.4780                   | 0.5768     | 0.2519         |
| 5-HETE                                                   | 0.1152                  | 0.0133     | 0.1067                   | 0.0113     | 0.6270         |
| 20-HETE                                                  | 0.0280                  | 0.0044     | 0.0230                   | 0.0028     | 0.3415         |
| 11-HETE                                                  | 0.1799                  | 0.0245     | 0.1816                   | 0.0347     | 0.9693         |
| 16-HETE                                                  | 0.0198                  | 0.0048     | 0.0164                   | 0.0044     | 0.6330         |
| 17-HETE                                                  | 0.0305                  | 0.0036     | 0.0292                   | 0.0040     | 0.8132         |
| 18-HETE                                                  | 0.0463                  | 0.0051     | 0.0429                   | 0.0054     | 0.6481         |
| 9-HETE                                                   | 0.0289                  | 0.0069     | 0.0328                   | 0.0086     | 0.7265         |
| 8-HETE                                                   | 0.0257                  | 0.0042     | 0.0241                   | 0.0033     | 0.7652         |

|                            |          |         |          |         |        |
|----------------------------|----------|---------|----------|---------|--------|
| 5-HETrE                    | 0.0175   | 0.0029  | 0.0151   | 0.0017  | 0.5125 |
| 8-HETrE                    | 0.0159   | 0.0022  | 0.0197   | 0.0039  | 0.4322 |
| 15-HETrE                   | 148.2692 | 10.5400 | 130.7339 | 10.0428 | 0.2335 |
| 2,3-dinor-11beta-PGF2a     | 0.0060   | 0.0004  | 0.0040   | 0.0003  | 0.0678 |
| tetranor-PGFM              | 0.0048   | 0.0004  | 0.0073   | 0.0007  | 0.2945 |
| 12-oxoLTB4                 | 0.0108   | 0.0014  | 0.0049   | 0.0004  | 0.0112 |
| PGA2/PGJ2                  | 0.0073   | 0.0010  | 0.0056   | 0.0006  | 0.2730 |
| PGB2                       | 0.0075   | 0.0010  | 0.0093   | 0.0017  | 0.6495 |
| 15-deoxy-delta12,14-PGD2   | 0.0086   | 0.0010  | 0.0057   | 0.0006  | 0.1730 |
| 13,14-dihydro-15-keto PGA2 | 0.0100   | 0.0018  | 0.0128   | 0.0031  | 0.5429 |
| Bicyclo PGE2               | 0.0075   | 0.0011  | 0.0058   | 0.0007  | 0.2913 |
| delta12-PGJ2               | 0.0072   | 0.0010  | 0.0066   | 0.0010  | 0.7760 |
| LTB4                       | 0.0158   | 0.0033  | 0.0165   | 0.0023  | 0.8642 |
| 5,6-diHETE                 | 0.0183   | 0.0043  | 0.0366   | 0.0113  | 0.1480 |
| 5,15-diHETE                | 0.0048   | 0.0006  | 0.0062   | 0.0007  | 0.3230 |
| Hepoxilin A3               | 0.0100   | 0.0014  | 0.0087   | 0.0007  | 0.4798 |
| 14,15-diHETE               | 0.0102   | 0.0013  | 0.0068   | 0.0011  | 0.1785 |
| 17,18-diHETE               | 0.1301   | 0.0206  | 0.1379   | 0.0129  | 0.7505 |
| PGA1                       | 0.0067   | 0.0005  | 0.0068   | 0.0011  | 0.9256 |
| 5,6-diHETrE                | 0.0147   | 0.0031  | 0.0177   | 0.0021  | 0.4621 |
| 8,9-diHETrE                | 0.0306   | 0.0043  | 0.0280   | 0.0044  | 0.6653 |
| 11,12-diHETrE              | 0.1568   | 0.0159  | 0.1290   | 0.0106  | 0.1526 |
| 14,15-diHETrE              | 0.1561   | 0.0193  | 0.1517   | 0.0106  | 0.8433 |
| 2,3-dinor TxB2             | 0.0062   | 0.0006  | 0.0065   | 0.0006  | 0.7845 |
| 17-HDHA                    | 0.8257   | 0.7073  | 0.2912   | 0.2441  | 0.5392 |
| 14-HDHA                    | 0.0065   | 0.0011  | 0.0120   | 0.0019  | 0.0516 |
| 7-HDHA                     | 0.0064   | 0.0011  | 0.0060   | 0.0009  | 0.8200 |
| 4-HDHA                     | 0.0153   | 0.0026  | 0.0100   | 0.0020  | 0.1535 |
| 8-HDHA                     | 0.0116   | 0.0015  | 0.0062   | 0.0006  | 0.0357 |
| 10-HDHA                    | 0.0147   | 0.0024  | 0.0114   | 0.0015  | 0.3046 |
| 11-HDHA                    | 0.0119   | 0.0014  | 0.0115   | 0.0016  | 0.8833 |
| 13-HDHA                    | 0.0113   | 0.0021  | 0.0062   | 0.0008  | 0.1057 |
| 16-HDHA                    | 0.0113   | 0.0021  | 0.0102   | 0.0014  | 0.6820 |
| 20-HDHA                    | 0.0106   | 0.0016  | 0.0101   | 0.0020  | 0.8686 |
| 19(20)-EpDPE               | 0.0168   | 0.0021  | 0.0096   | 0.0017  | 0.0180 |
| 16(17)-EpDPE               | 0.0120   | 0.0015  | 0.0122   | 0.0021  | 0.9410 |
| PGD3/PGE3                  | 0.0083   | 0.0011  | 0.0070   | 0.0010  | 0.5712 |
| 15-keto-PGE2               | 0.0000   | 0.0000  | 0.0084   | 0.0000  | 0.0000 |
| PGK2                       | 0.0060   | 0.0010  | 0.0065   | 0.0010  | 0.8381 |
| 13,14-dihydro-15-keto PGE2 | 0.0075   | 0.0012  | 0.0093   | 0.0009  | 0.3801 |
| 13,14-dihydro-15-keto PGD2 | 0.0072   | 0.0012  | 0.0060   | 0.0006  | 0.5040 |
| 15-keto-PGF2a              | 0.0076   | 0.0013  | 0.0057   | 0.0006  | 0.4163 |

|                                 |        |        |        |        |        |
|---------------------------------|--------|--------|--------|--------|--------|
| PGE2/PGD2                       | 0.0105 | 0.0016 | 0.0140 | 0.0020 | 0.2343 |
| PGD2                            | 0.0083 | 0.0012 | 0.0063 | 0.0005 | 0.2691 |
| LXA4                            | 0.0082 | 0.0014 | 0.0063 | 0.0010 | 0.3910 |
| LXB4                            | 0.0062 | 0.0011 | 0.0073 | 0.0011 | 0.6203 |
| PGF2a                           | 0.0095 | 0.0013 | 0.0126 | 0.0017 | 0.2042 |
| 8-iso PGF2a                     | 0.0099 | 0.0013 | 0.0117 | 0.0015 | 0.4320 |
| 5-iPF2a-VI                      | 0.0241 | 0.0094 | 0.0149 | 0.0016 | 0.3548 |
| PGE1/PGD1                       | 0.0076 | 0.0009 | 0.0075 | 0.0008 | 0.9684 |
| 11-beta-PGF2a/PGF2b             | 0.0101 | 0.0013 | 0.0114 | 0.0015 | 0.5718 |
| 13,14-dihydro-15-keto PGF2a     | 0.0106 | 0.0011 | 0.0124 | 0.0017 | 0.4132 |
| Maresin1                        | 0.0000 | 0.0000 | 0.0036 | 0.0003 | 0.0000 |
| PD1                             | 0.0086 | 0.0011 | 0.0074 | 0.0013 | 0.6604 |
| 19,20-diHDPA                    | 0.0845 | 0.0130 | 0.0843 | 0.0084 | 0.9927 |
| 20-carboxy LTB4                 | 0.0319 | 0.0085 | 0.0133 | 0.0023 | 0.1036 |
| TxB3                            | 0.0088 | 0.0011 | 0.0146 | 0.0037 | 0.2241 |
| 11-dehydro TxB2                 | 0.0069 | 0.0014 | 0.0052 | 0.0006 | 0.4553 |
| 19/20-OH PGE2                   | 0.0065 | 0.0006 | 0.0059 | 0.0004 | 0.7715 |
| 6-keto PGE1                     | 0.0043 | 0.0005 | 0.0059 | 0.0006 | 0.2995 |
| TxB2                            | 1.9404 | 0.7048 | 3.0967 | 1.4077 | 0.4668 |
| 6-keto-PGF1a                    | 0.0171 | 0.0032 | 0.0208 | 0.0058 | 0.6258 |
| 19/20-OH PGF2a                  | 0.0079 | 0.0009 | 0.0059 | 0.0005 | 0.2707 |
| 5,15-diketo-13,14-dihydro PGF1a | 0.0077 | 0.0010 | 0.0057 | 0.0004 | 0.2658 |
| RvD1                            | 0.0064 | 0.0006 | 0.0043 | 0.0004 | 0.1566 |
| RvD2                            | 0.0061 | 0.0011 | 0.0080 | 0.0017 | 0.6787 |
| LTE4                            | 0.0127 | 0.0018 | 0.0009 | 0.0000 | 0.0000 |
| LTD4                            | 0.0060 | 0.0013 | 0.0062 | 0.0007 | 0.9620 |
| LTC4                            | 0.0082 | 0.0001 | 0.0048 | 0.0004 | 0.0429 |
| d4-9-HODE                       | 0.0000 | 0.0000 | 0.0000 | 0.0000 | 0.0000 |
| d8-5S-HETE                      | 0.0000 | 0.0000 | 0.0000 | 0.0000 | 0.0000 |
| d4-LTB4                         | 0.0000 | 0.0000 | 0.0000 | 0.0000 | 0.0000 |
| d4-PGE2                         | 0.0000 | 0.0000 | 0.0000 | 0.0000 | 0.0000 |
| PGF1a                           | 0.0943 | 0.0082 | 0.0943 | 0.0079 | 0.9993 |
| 13,14-dihydro PGE1              | 0.0422 | 0.0066 | 0.0348 | 0.0047 | 0.4164 |

**Supplemental Table 2. Related to Figure 1.**

**% Fat Mass as a Covariate**

**Spearman correlation coefficient**

| <b>Variable correlated with 12 13 diHOME</b> | <b>R</b> | <b>P</b> |
|----------------------------------------------|----------|----------|
| VO2peak (ml/Kg/min)                          | 0.1214   | 0.4679   |
| Body Mass Index (kg/m <sup>2</sup> )         | -0.2877  | 0.0647   |
| Triglycerides (mg/dL)                        | -0.3554  | 0.0209   |
| Weight Average (kg)                          | -0.2433  | 0.1410   |

**Pearson correlation coefficient**

| <b>Variable correlated with 12 13 diHOME</b> | <b>R</b> | <b>P</b> |
|----------------------------------------------|----------|----------|
| VO2peak (ml/Kg/min)                          | 0.1889   | 0.2560   |
| Body Mass Index (kg/m <sup>2</sup> )         | -0.2968  | 0.0563   |
| Triglycerides (mg/dL)                        | -0.3827  | 0.0124   |
| Weight Average (kg)                          | -0.2403  | 0.1462   |

**Supplemental Table 3. Related to Figure 2.**

| <b>Signaling Lipids in BAT (Sedentary vs. Trained)</b> |                |              |                  |              |                |
|--------------------------------------------------------|----------------|--------------|------------------|--------------|----------------|
| <b>Lipid</b>                                           | <b>Avg Sed</b> | <b>SEM</b>   | <b>Avg Train</b> | <b>SEM</b>   | <b>p-value</b> |
| 9-oxoODE                                               | 2.710          | 0.623        | 2.828            | 0.728        | 0.904          |
| 13-oxoODE                                              | 1.629          | 0.282        | 2.739            | 0.885        | 0.277          |
| 9-HOTrE                                                | 0.364          | 0.089        | 0.496            | 0.167        | 0.505          |
| HOTrE/13-HOTrE                                         | 0.269          | 0.059        | 0.375            | 0.086        | 0.338          |
| 9-HODE                                                 | 13.241         | 2.444        | 17.024           | 5.984        | 0.578          |
| 13-HODE                                                | 20.447         | 3.203        | 23.406           | 8.180        | 0.747          |
| 9(10)-EpOME                                            | 13.643         | 1.763        | 17.130           | 3.027        | 0.349          |
| 12(13)-EpOME                                           | 10.681         | 1.586        | 12.628           | 2.859        | 0.568          |
| 9,10-diHOME                                            | 3.471          | 0.381        | 5.366            | 1.055        | 0.140          |
| <b>12,13-diHOME*</b>                                   | <b>2.704</b>   | <b>0.317</b> | <b>4.703</b>     | <b>0.738</b> | <b>0.0427</b>  |
| 18-HEPE                                                | 0.143          | 0.021        | 0.170            | 0.029        | 0.467          |
| 15-HEPE                                                | 0.093          | 0.010        | 0.115            | 0.027        | 0.481          |
| 12-HEPE                                                | 1.637          | 0.238        | 1.798            | 0.655        | 0.825          |
| 5-HEPE                                                 | 0.189          | 0.026        | 0.241            | 0.048        | 0.368          |
| 11-HEPE                                                | 0.107          | 0.013        | 0.140            | 0.027        | 0.316          |
| 8-HEPE                                                 | 0.062          | 0.008        | 0.083            | 0.024        | 0.422          |
| 15-oxoETE                                              | 0.059          | 0.016        | 0.055            | 0.010        | 0.847          |
| 9-HEPE                                                 | 0.038          | 0.007        | 0.054            | 0.019        | 0.457          |
| 14(15)-EET                                             | 0.274          | 0.054        | 0.286            | 0.051        | 0.873          |
| 11(12)-EET                                             | 0.415          | 0.069        | 0.489            | 0.127        | 0.626          |
| 8(9)-EET                                               | 0.057          | 0.028        | 0.071            | 0.033        | 0.758          |
| 5(6)-EET                                               | 0.100          | 0.014        | 0.102            | 0.026        | 0.941          |
| 15-HETE                                                | 0.406          | 0.056        | 0.468            | 0.110        | 0.632          |
| 12-HETE                                                | 3.721          | 1.100        | 2.277            | 0.772        | 0.311          |
| 5-HETE                                                 | 0.629          | 0.111        | 0.569            | 0.091        | 0.682          |
| 20-HETE                                                | 0.007          | 0.003        | 0.011            | 0.004        | 0.476          |
| 11-HETE                                                | 0.889          | 0.110        | 0.947            | 0.188        | 0.797          |
| 16-HETE                                                | 0.007          | 0.007        | 0.021            | 0.013        | 0.332          |
| 17-HETE                                                | 0.014          | 0.004        | 0.024            | 0.008        | 0.273          |
| 18-HETE                                                | 0.091          | 0.008        | 0.123            | 0.028        | 0.311          |
| 9-HETE                                                 | 0.216          | 0.044        | 0.151            | 0.038        | 0.291          |
| 8-HETE                                                 | 0.256          | 0.040        | 0.246            | 0.062        | 0.892          |
| all trans-LTB4                                         | 0.013          | 0.007        | 0.003            | 0.002        | 0.235          |
| LTB4                                                   | 0.018          | 0.006        | 0.006            | 0.003        | 0.096          |
| 5,6-diHETE                                             | 0.018          | 0.008        | 0.021            | 0.010        | 0.802          |
| 5,15-diHETE                                            | 0.001          | 0.001        | 0.001            | 0.000        | 0.973          |
| Hepoxilin A3                                           | 0.029          | 0.013        | 0.038            | 0.015        | 0.686          |
| 17-HDHA                                                | 0.078          | 0.009        | 0.113            | 0.030        | 0.317          |
| 14-HDHA                                                | 0.431          | 0.086        | 0.477            | 0.132        | 0.777          |
| 7-HDHA                                                 | 0.055          | 0.010        | 0.052            | 0.009        | 0.775          |
| 4-HDHA                                                 | 0.200          | 0.030        | 0.268            | 0.048        | 0.264          |
| <b>8-HDHA #</b>                                        | <b>0.101</b>   | <b>0.039</b> | <b>0.000</b>     | <b>0.000</b> | <b>0.049</b>   |
| 10-HDHA                                                | 0.282          | 0.080        | 0.324            | 0.049        | 0.664          |
| 11-HDHA                                                | 0.122          | 0.014        | 0.131            | 0.026        | 0.778          |
| 13-HDHA                                                | 0.242          | 0.038        | 0.292            | 0.064        | 0.525          |
| 16-HDHA                                                | 0.281          | 0.037        | 0.321            | 0.050        | 0.537          |
| 20-HDHA                                                | 0.237          | 0.043        | 0.283            | 0.058        | 0.539          |
| 19(20)-EpDPE                                           | 0.054          | 0.034        | 0.025            | 0.016        | 0.467          |
| 16(17)-EpDPE                                           | 0.168          | 0.030        | 0.147            | 0.042        | 0.692          |

|                      |              |              |              |              |              |
|----------------------|--------------|--------------|--------------|--------------|--------------|
| PGE2/PGD2            | 0.089        | 0.026        | 0.056        | 0.013        | 0.302        |
| PGD2                 | 0.038        | 0.005        | 0.025        | 0.005        | 0.084        |
| LXA4                 | 0.028        | 0.011        | 0.033        | 0.006        | 0.726        |
| LXB4                 | 0.006        | 0.003        | 0.005        | 0.002        | 0.942        |
| 15-keto-PGF2a        | 0.007        | 0.002        | 0.006        | 0.002        | 0.794        |
| dihydro-15-keto      | 0.028        | 0.011        | 0.014        | 0.006        | 0.314        |
| dihydro-15-keto      | 0.020        | 0.005        | 0.027        | 0.008        | 0.493        |
| PGF2a                | 0.031        | 0.009        | 0.018        | 0.002        | 0.217        |
| PGE1/D1              | 0.017        | 0.005        | 0.021        | 0.006        | 0.637        |
| 8-iso PGF2a          | 0.030        | 0.009        | 0.020        | 0.003        | 0.336        |
| 5-iPF2a-VI           | 0.008        | 0.003        | 0.004        | 0.001        | 0.302        |
| PD1                  | 0.061        | 0.042        | 0.023        | 0.008        | 0.410        |
| TxB2                 | 0.029        | 0.008        | 0.017        | 0.006        | 0.224        |
| 6-keto-PGF1a         | 0.018        | 0.012        | 0.003        | 0.002        | 0.245        |
| 19/20-OH PGF2a       | 0.002        | 0.001        | 0.002        | 0.001        | 0.915        |
| RvD1                 | 0.003        | 0.001        | 0.005        | 0.002        | 0.565        |
| RvD2                 | 0.002        | 0.001        | 0.002        | 0.001        | 0.940        |
| LTE4                 | 0.000        | 0.000        | 0.000        | 0.000        | N/A          |
| LTD4                 | 0.002        | 0.001        | 0.001        | 0.000        | 0.504        |
| LTC4                 | 0.001        | 0.000        | 0.000        | 0.000        | 0.094        |
| PGF1a                | 0.000        | 0.000        | 0.001        | 0.001        | 0.363        |
| PGD3                 | 0.010        | 0.004        | 0.006        | 0.002        | 0.494        |
| PGA2/PGJ2            | 0.012        | 0.008        | 0.003        | 0.001        | 0.293        |
| PGB2                 | 0.003        | 0.002        | 0.001        | 0.001        | 0.545        |
| eoxy-delta12,14-P    | 0.007        | 0.002        | 0.007        | 0.003        | 0.977        |
| <b>5,6-DiHETrE #</b> | <b>0.031</b> | <b>0.007</b> | <b>0.013</b> | <b>0.003</b> | <b>0.050</b> |
| <b>8,9-DiHETrE #</b> | <b>0.067</b> | <b>0.010</b> | <b>0.025</b> | <b>0.004</b> | <b>0.008</b> |
| 11,12-DiHETrE        | 0.101        | 0.021        | 0.070        | 0.017        | 0.268        |
| 14,15-DiHETrE        | 0.174        | 0.031        | 0.118        | 0.016        | 0.144        |
| 5-HETrE              | 0.019        | 0.005        | 0.036        | 0.015        | 0.341        |
| 8-HETrE              | 0.172        | 0.020        | 0.137        | 0.032        | 0.374        |
| 15-HETrE             | 0.485        | 0.045        | 0.491        | 0.088        | 0.957        |
| 19,20-DiHDPA         | 0.210        | 0.027        | 0.238        | 0.040        | 0.577        |
| dinor-11beta-PG      | 0.001        | 0.001        | 0.001        | 0.000        | 0.746        |
| eoxy-delta12,14      | 0.011        | 0.005        | 0.009        | 0.004        | 0.868        |
| TxB3                 | 0.004        | 0.002        | 0.004        | 0.001        | 0.843        |
| Tetranor-12-HETE     | 0.008        | 0.002        | 0.006        | 0.002        | 0.560        |

**Supplemental Table 4. Related to Figure 2, Figure S2. Primer Sequences.**

| Primer  | Sequence                    |
|---------|-----------------------------|
| Ephx1 F | GGAGACCTTACCACTTGAAGATG     |
| Ephx1 R | GCCCGGAACCTATCTATCCTCT      |
| Ephx2 F | ACCACTCATGGATGAAAGCTACA     |
| Ephx2 R | TCAGGTAGATTGGCTCCACAG       |
| Ephx3 F | CAGTGGACTCCGATAGCACG        |
| Ephx3 R | TGGGACGACTACAGAGCCG         |
| Ephx4 F | TCCCTGGTGTACGGCTACTG        |
| Ephx4 R | ATCTTAACCCGGAGTCCTTGA       |
| GAPDH F | AACTTTGGCATTGTGGAAGG        |
| GAPDH R | ACACATTGGGGGTAGGAACA        |
| Cs F    | GACTACATCTGGAACACACTCAATTCA |
| Cs R    | CGAGGGTCAGTCTTCCTCAGTAC     |
| Nrf1 F  | CAACAGGGGAAGAAACGGAAA       |
| Nrf1 R  | GCACCACATTCTCCAAAGGT        |
| Nrf2 F  | AGGTTGCCACATTCCCAAACAAG     |
| Nrf2 R  | TTGCTCCATGTCCTGCTCTATGCT    |
| Tfam F  | GTCCATAGGCACCGTATTGC        |
| Tfam R  | CCCATGCTGGAAAAACACTT        |
| Pgc1a F | GAATCAAGCCACTACAGACACCG     |
| Pgc1a R | CATCCCTCTTGAGCCTTTCGTG      |
| Cd36 F  | TGGAGCTGTTATTGGTGCAG        |
| Cd36 R  | TGGGTTTTGCACATCAAAGA        |
| Fatp1 F | TGCCACAGATCGGCGAGTTCTA      |
| Fatp1 R | AGTGGCTCCATCGTGTCTCAT       |
| Fatp4 F | GACTTCTCCAGCCGTTCCACA       |
| Fatp4 R | CAAAGGACAGGATGCGGCTATTG     |



### **Supplemental Video 1, Related to Figure 3.**

Representative imaging of FFA-SS-Luc uptake in Act1cre+/-Rosa(stop)Luc+/- injected intravenously with luciferin-conjugated fatty acid and 12,13-diHOME or vehicle. Data from individual images using sequential, thirty second exposures over approximately 15 minutes was stacked into a movie. The animal on the right is the vehicle treated and the mouse on the left is treated with 12,13-diHOME.

## Supplemental Figure Legends.

**Supplemental Figure 1. Lipidomics in human subjects after acute exercise, correlations with metabolic markers and  $VO_{2peak}$ , related to Figure 1.** (A) For all lipid species measured by LC-MS annotation of the precursor lipid species, whether the lipid was pro- or anti-inflammatory, and the enzyme pathway involved in biosynthesis of the lipid biosynthesis. (B-D) Correlations between linoleic acid metabolites (B) 12,13-epOME (n=39), (C) 9,10-epOME (n=39), and (D) 9,10-diHOME (n=39) and  $VO_{2peak}$ . (E-G) Correlations between 12,13-diHOME and all subjects (E) body weight (n=39), (F) triglycerides (n=39), and (G) glucose (n=39). Correlations between linoleic acid metabolites (H) 12,13-epOME (n=39), (I) 9,10-epOME (n=39), and (J) 9,10-diHOME (n=39) and BMI. Red (Young Active-YA, n=6), green (Older Active-OA, n=7), and black (Older Sedentary-OS, n=14) circles represent Cohort 1, while the blue (Young Sedentary Males - YS-M, n=6) and pink (Young Sedentary Females - YS-F, n=6) represent Cohort 2.

**Supplemental Figure 2. Body mass after exercise; gene expression after acute injection of 12,13-diHOME, related to Figures 2 and 4.** (A) Body mass in mice after 3 wks of exercise training. Data are means  $\pm$  s.e.m. (n=6). Asterisks represent differences compared to pre exercise ( $*P<0.05$ ). Expression of mitochondrial and fatty acid genes in (B) tibialis anterior (TA) skeletal muscle, (C) heart, (D) subcutaneous white adipose tissue (scWAT), (E) perigonadal white adipose tissue (pgWAT), (F) brown adipose tissue (BAT), and (G) liver. Data are means  $\pm$  s.e.m. (n=4/group). Asterisks represent differences compared to pre exercise ( $*P<0.05$ ;  $***P<0.001$ ).

**Supplemental Figure 3. 12,13-diHOME does not affect glucose uptake into skeletal muscle, related to Figure 4.** (A)  $^3H$ -2DG glucose uptake measured in differentiated C2C12 cells incubated with either vehicle or 12,13-diHOME. Data are means  $\pm$  s.e.m. (n=6/group).  $^3H$ -2DG Glucose uptake in isolated (B) soleus or (C) extensor digitorum longus (EDL) incubated with either vehicle or 12,13-diHOME (300 ng/ml) for one hour. Data are means  $\pm$  s.e.m. (n=6/group).

# Supplemental Figure 1

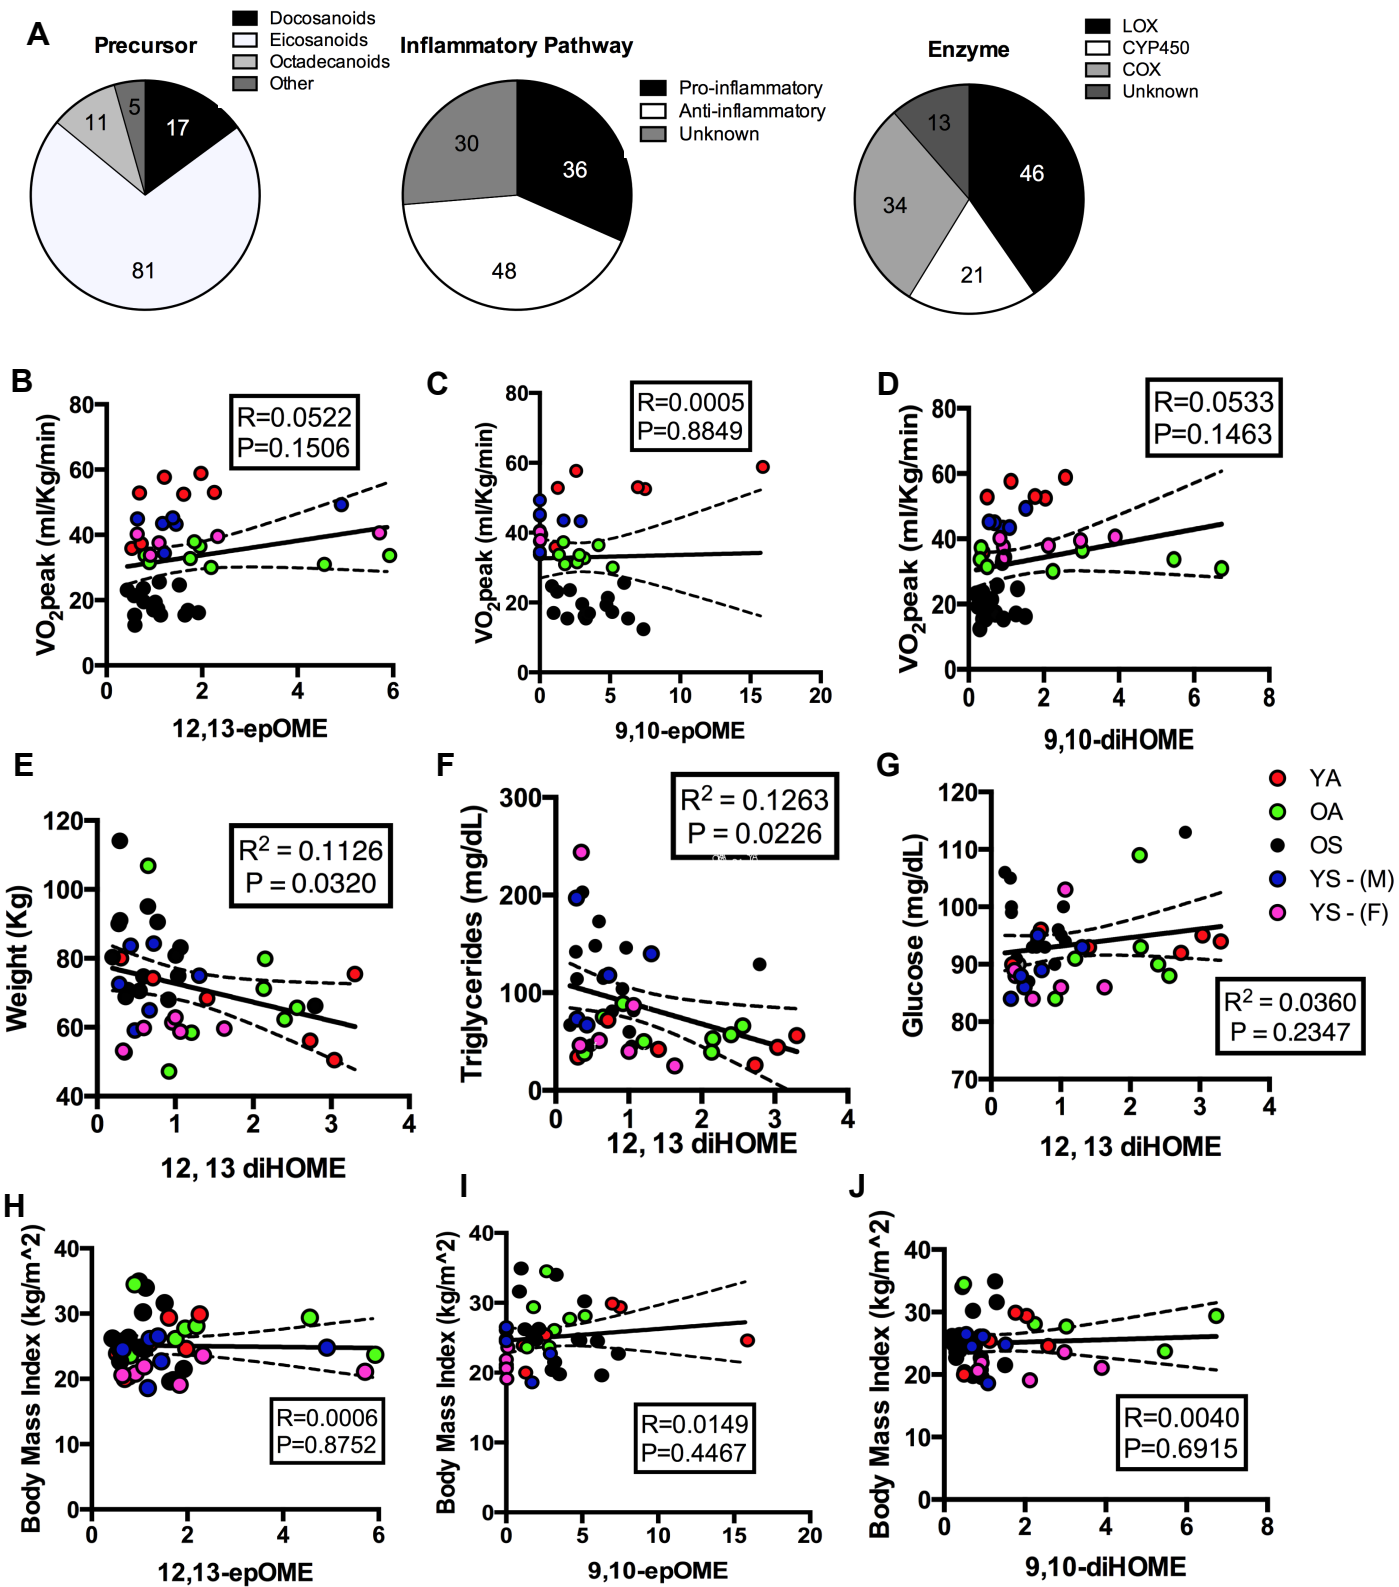

# Supplemental Figure 2

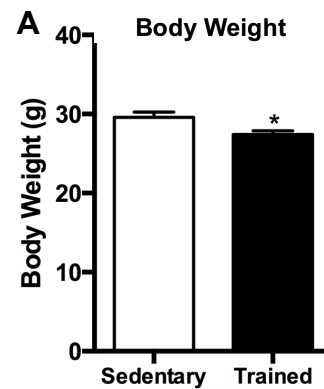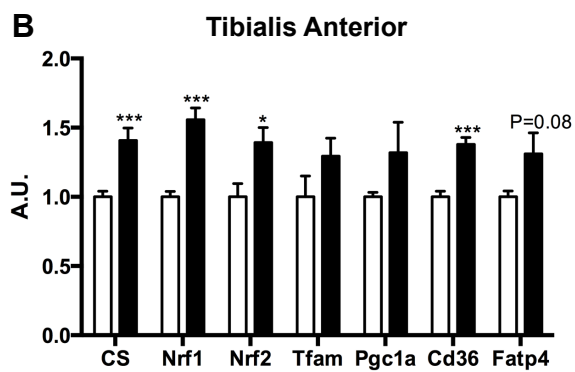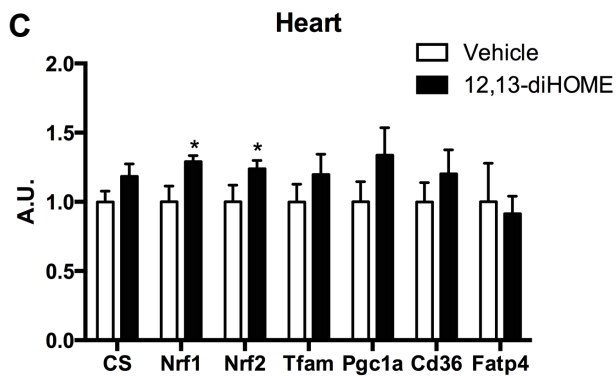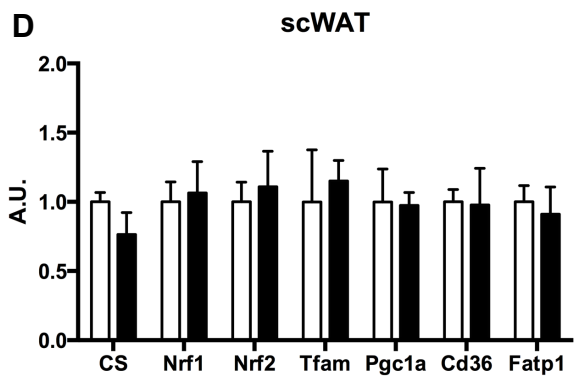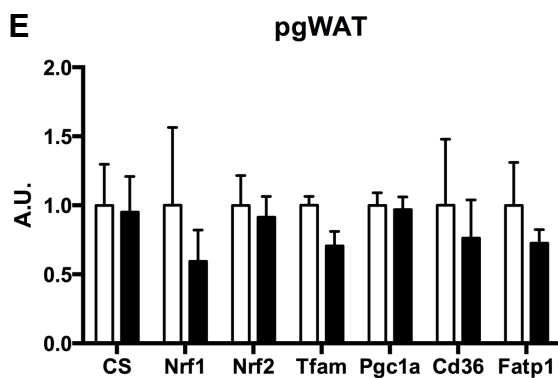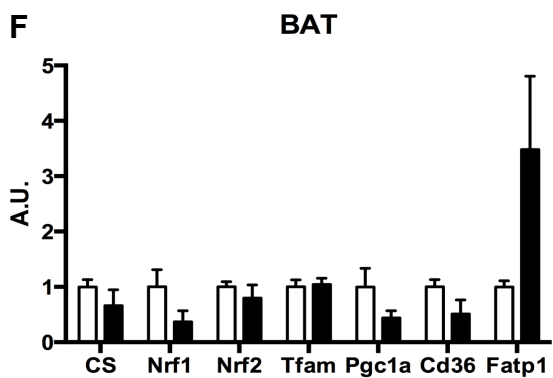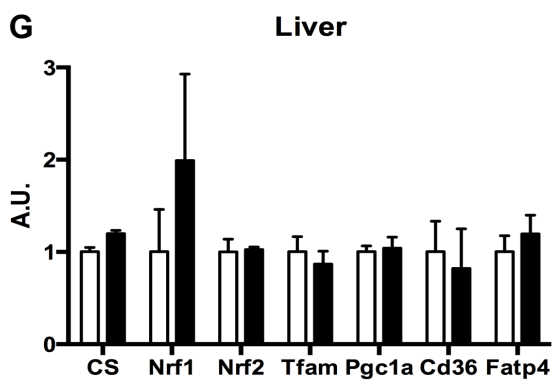

# Supplemental Figure 3

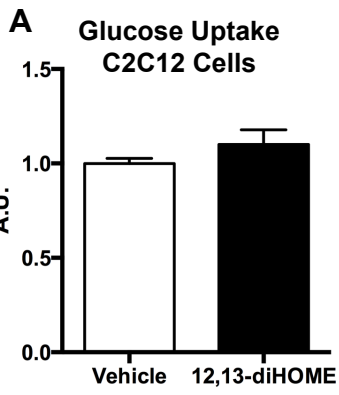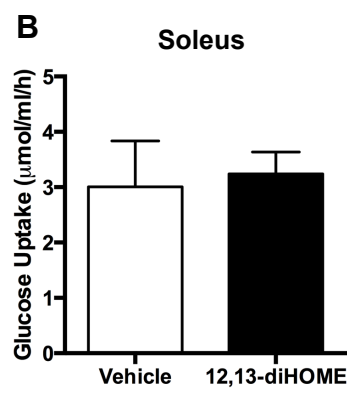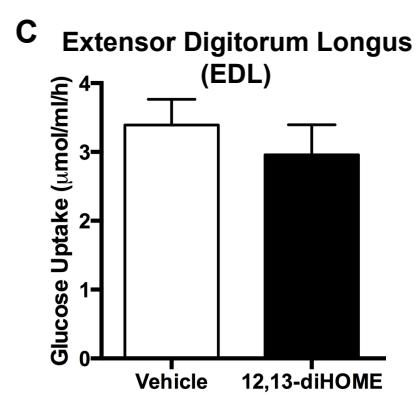

Supplement: NIHMS958062-supplement-2.pdf [file NIHMS958062-supplement-2.pdf]
